# Supplementary material
Source: bioRxiv or medRxiv preprint supplement (https://www.biorxiv.org/highwire/filestream/140046/field_highwire_adjunct_files/0/467225-1.pdf)

**a**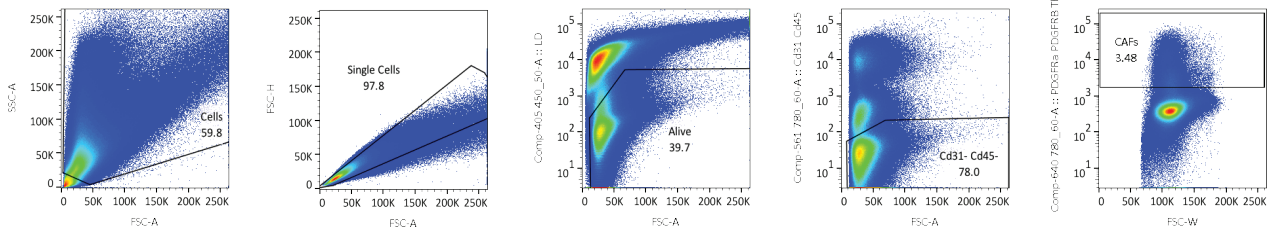**b**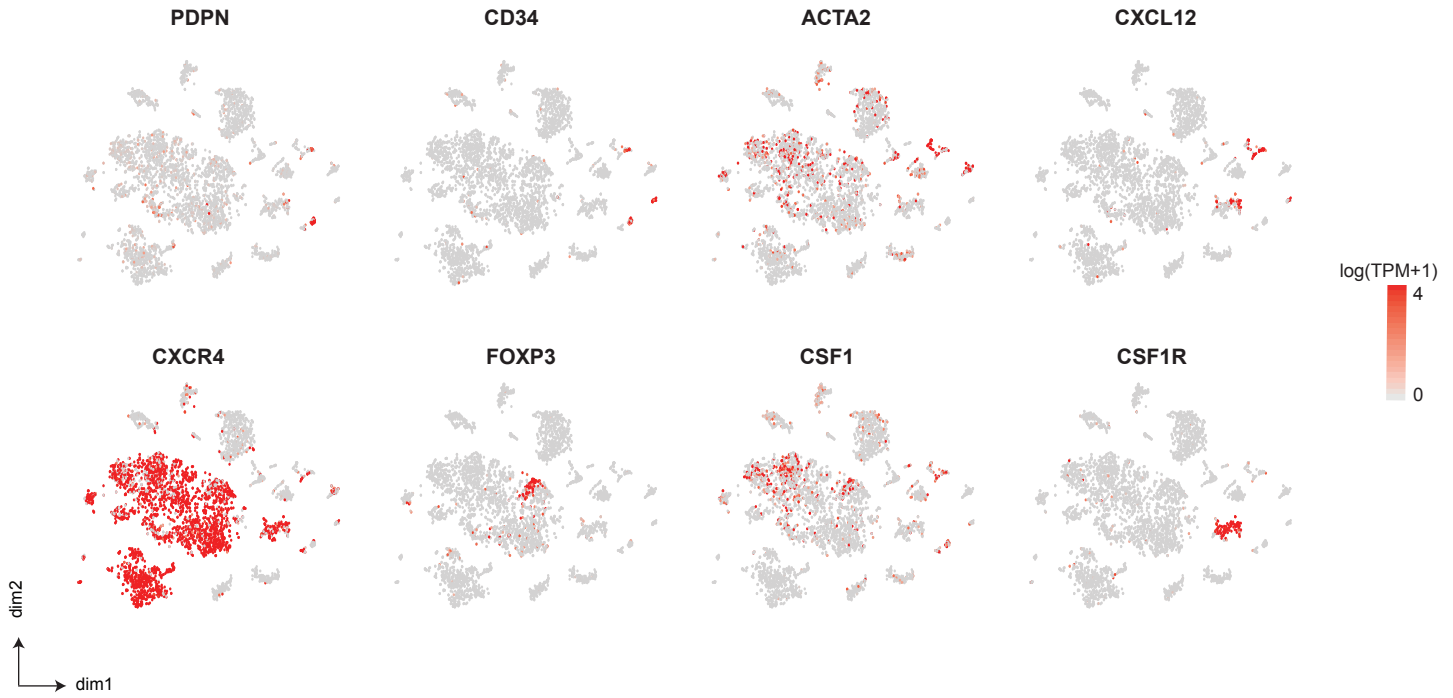

**a**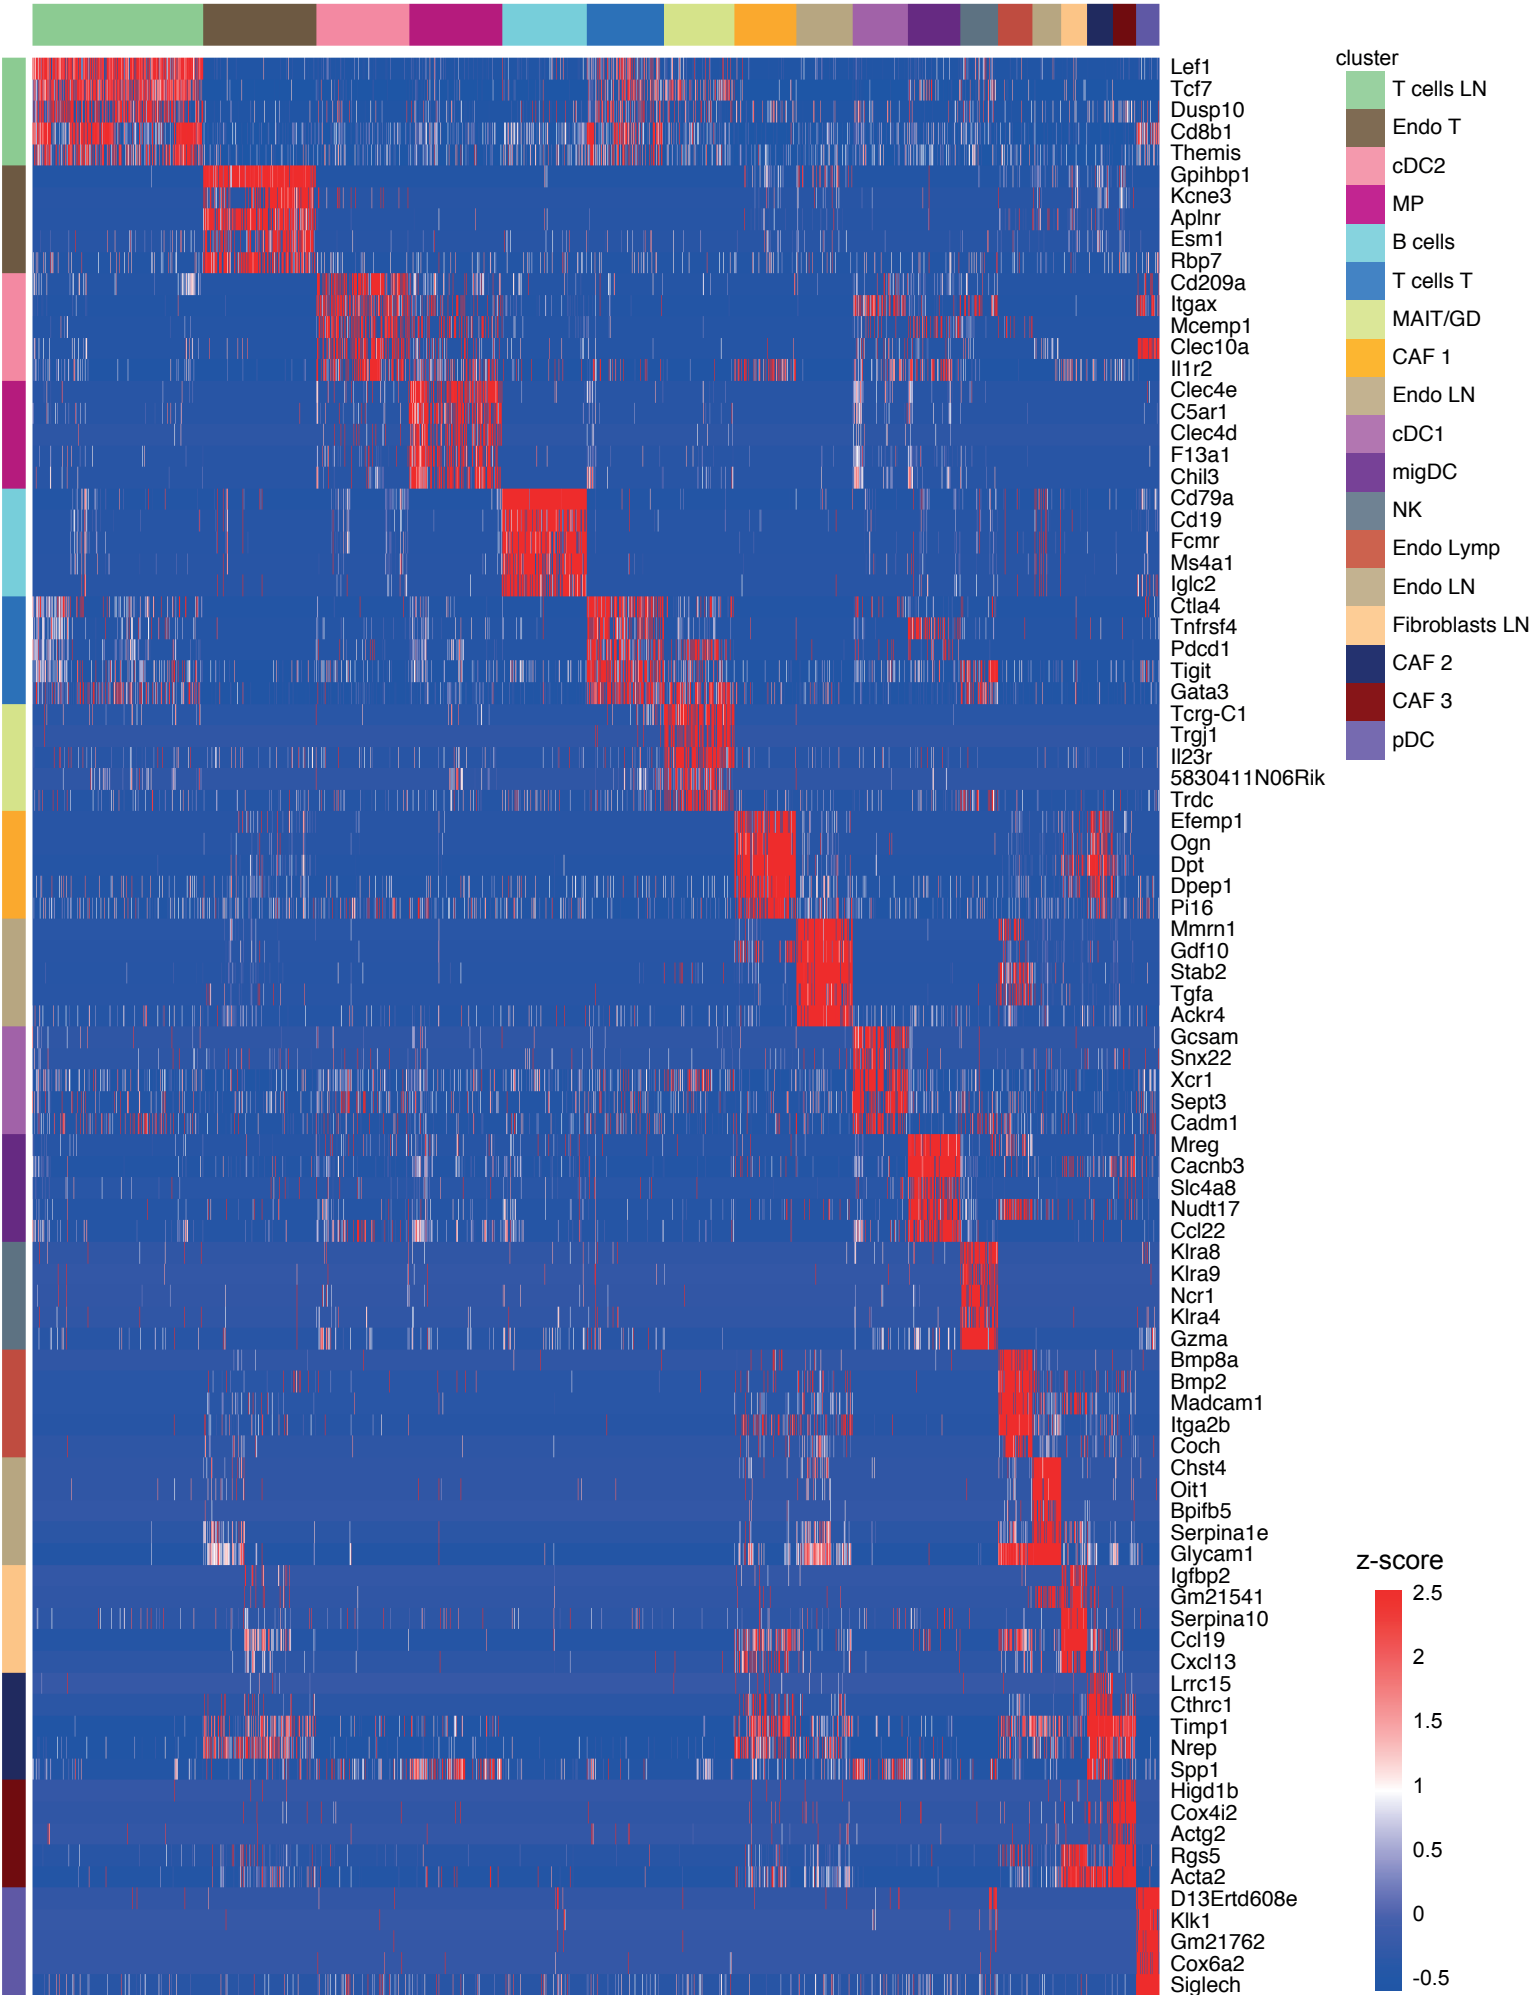

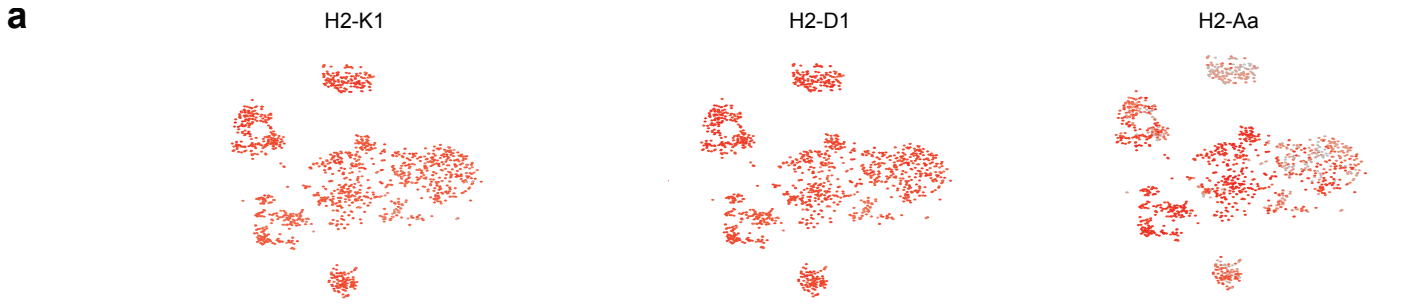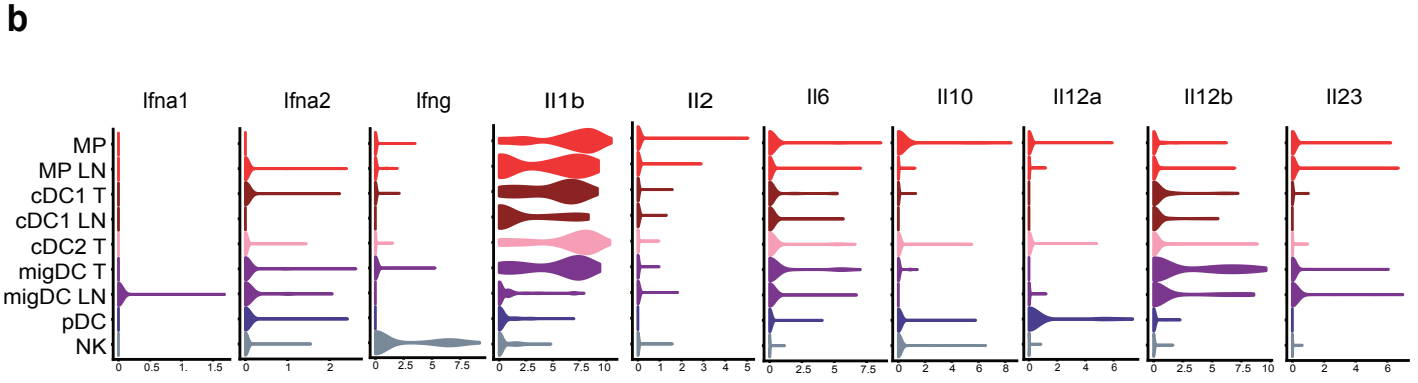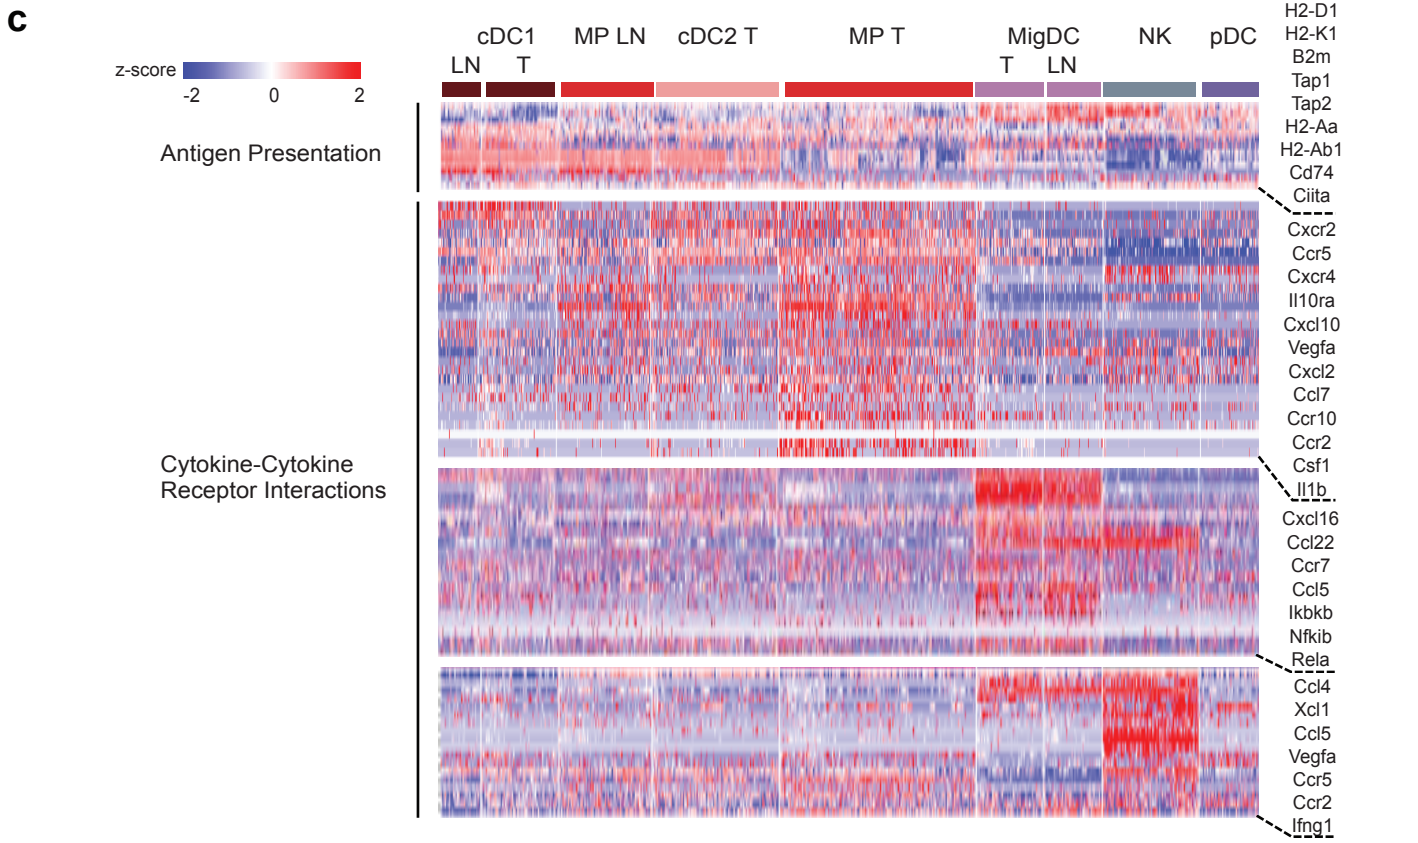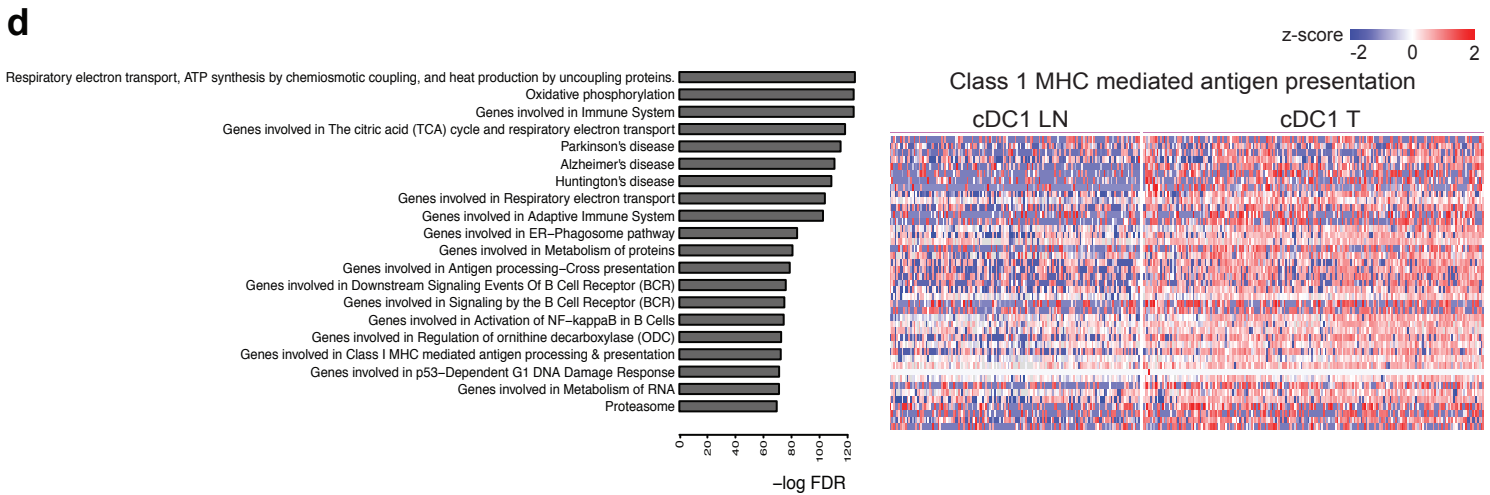

**a**

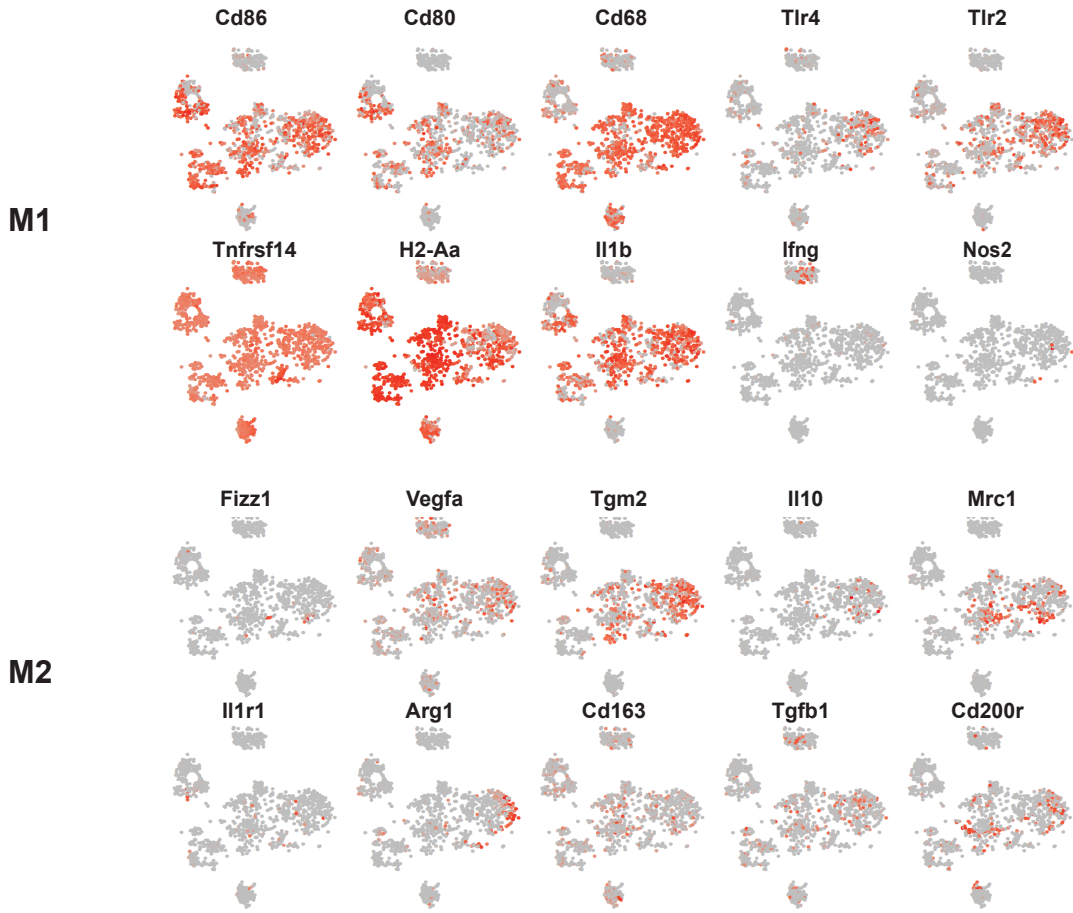

a

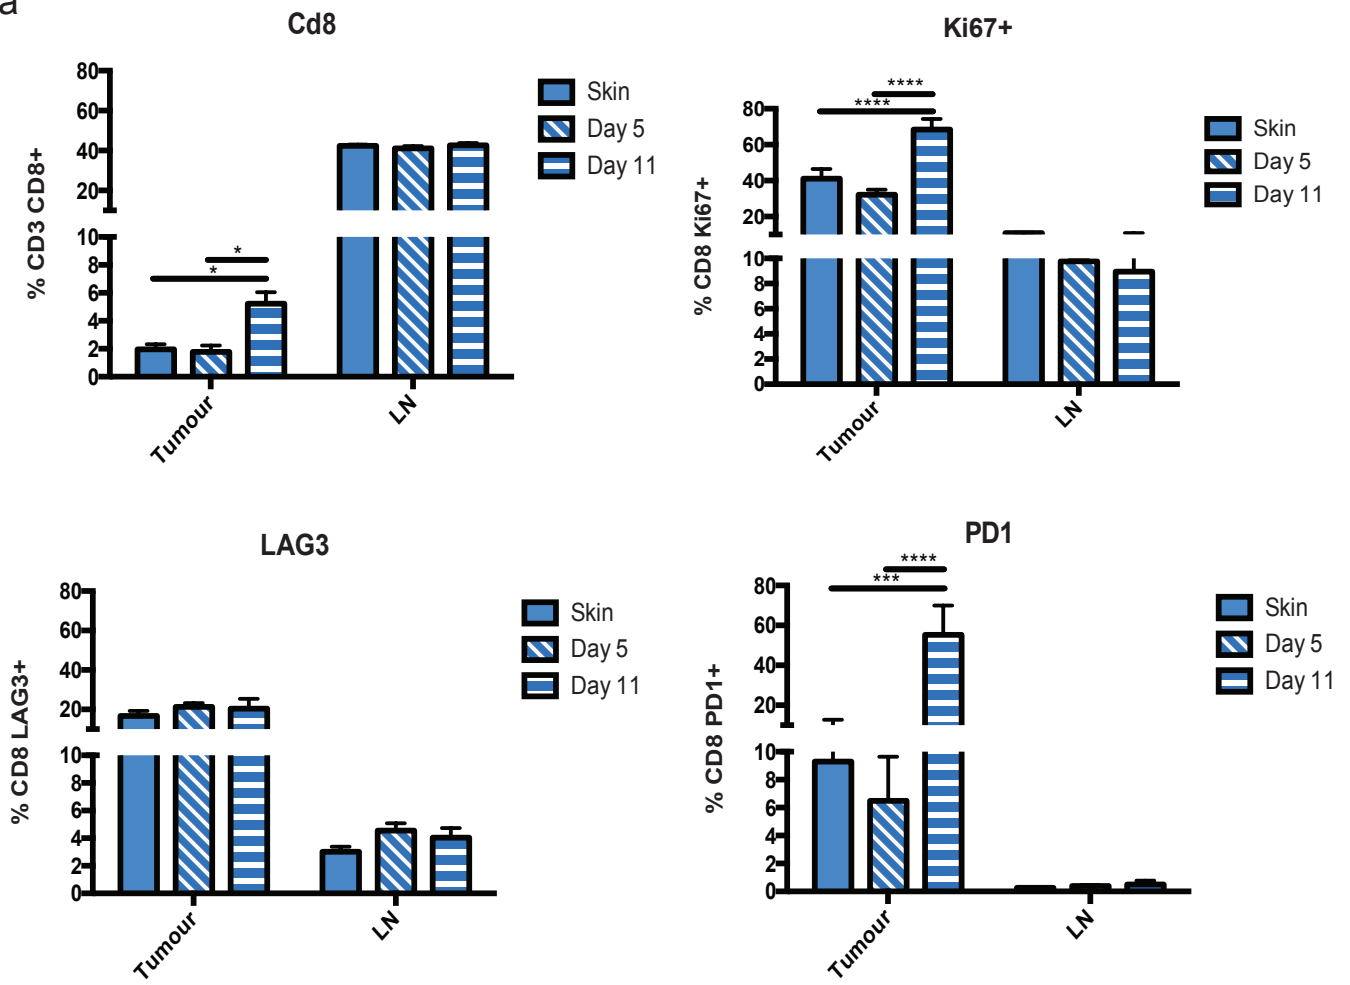

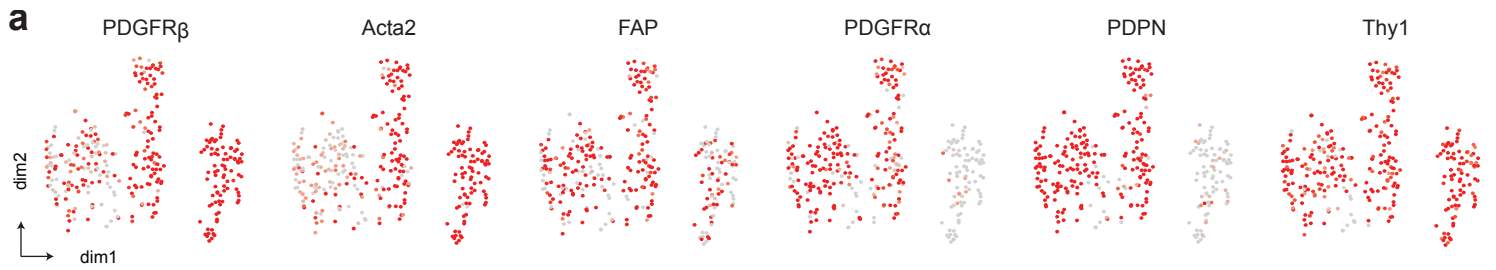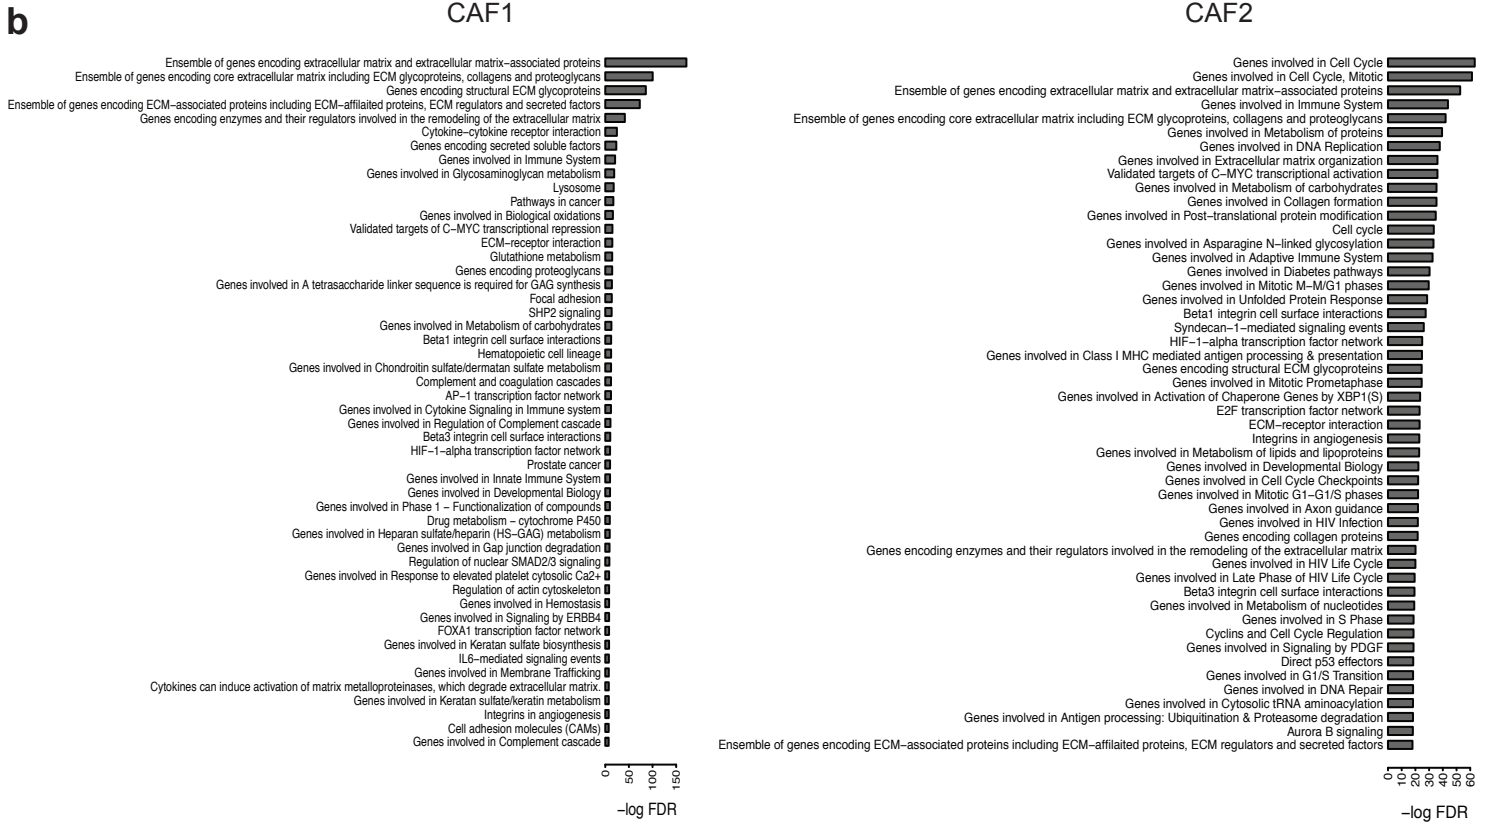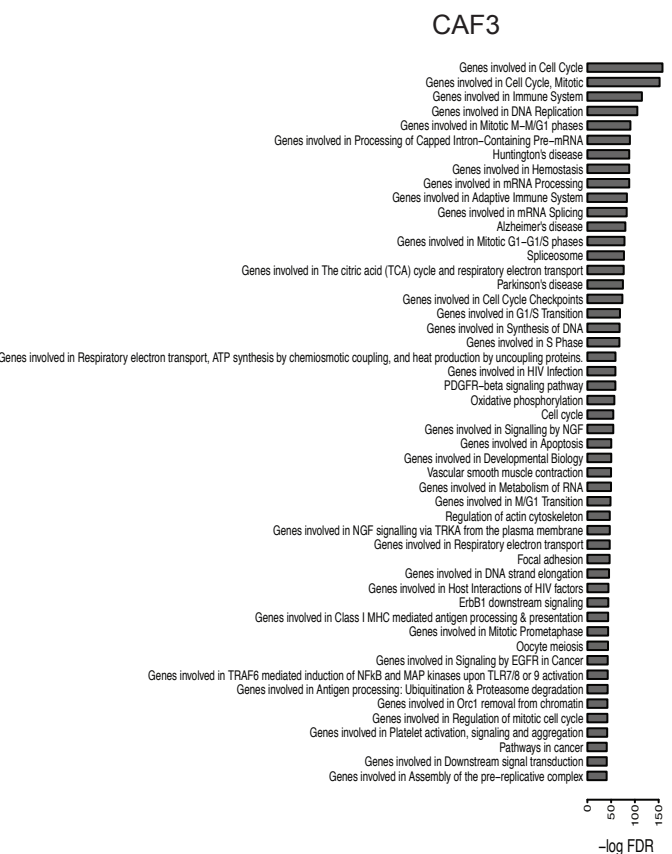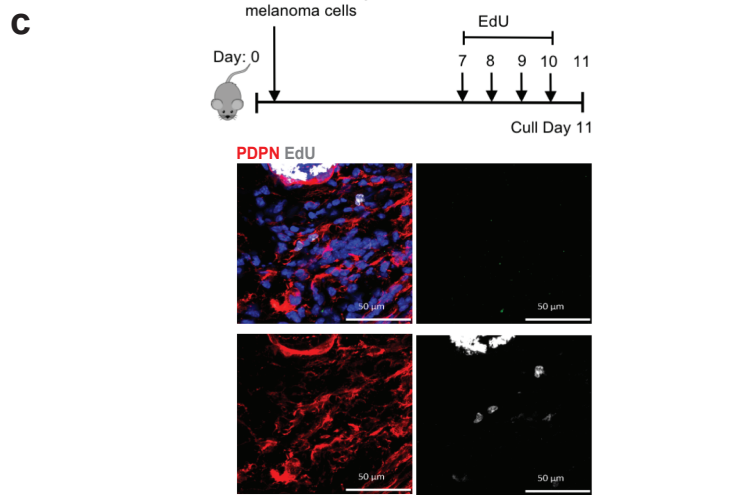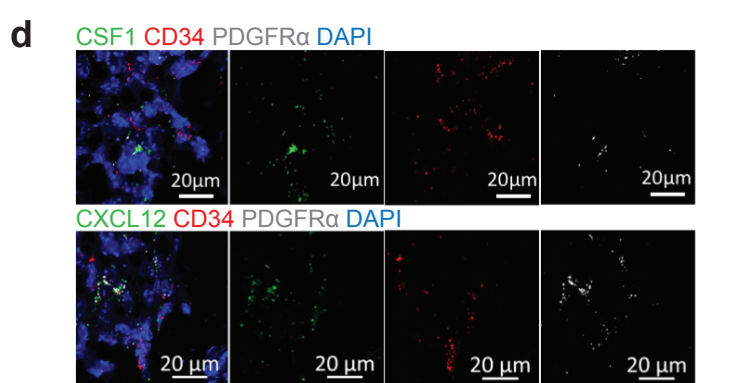

**a**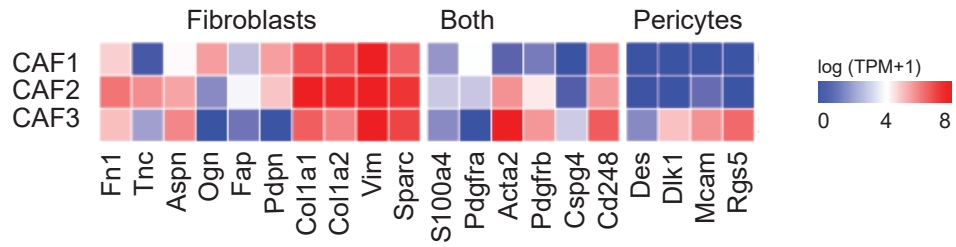**b**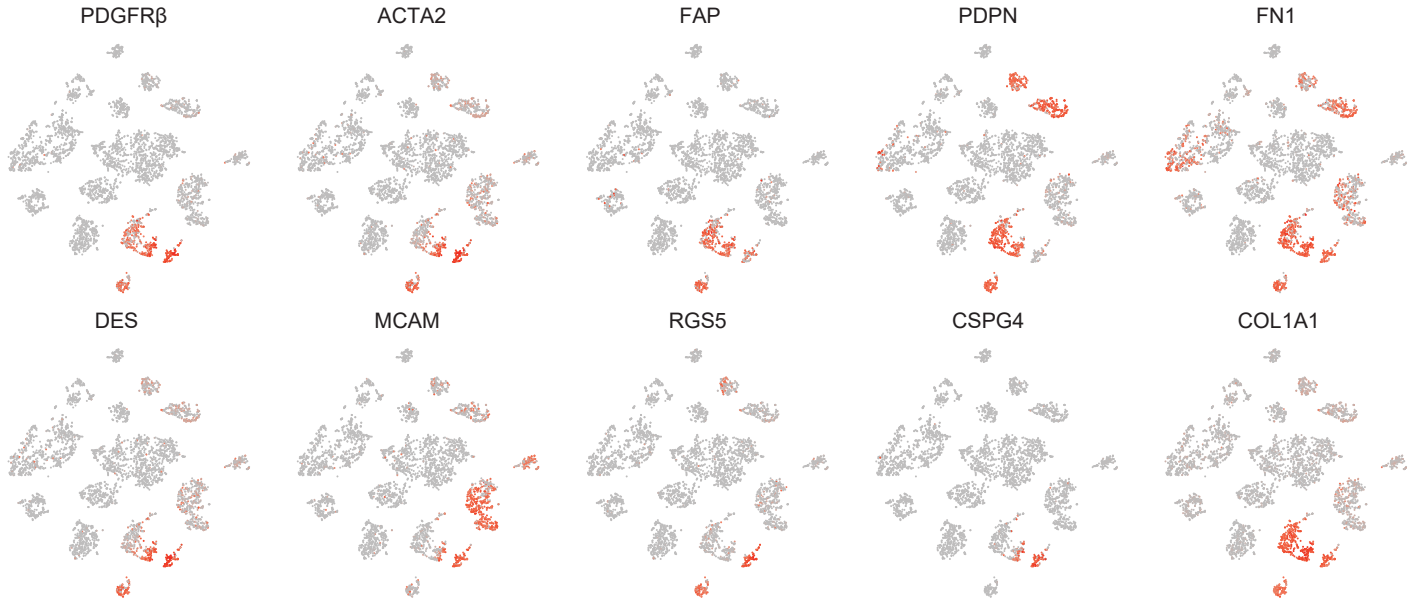**c**

CD31 αSMA DAPI

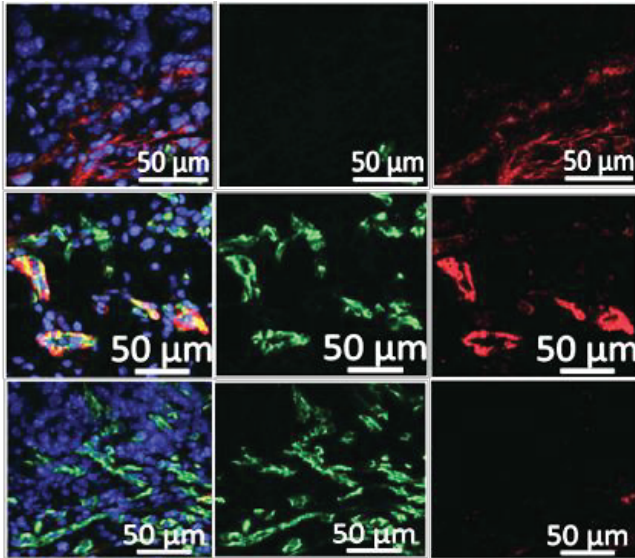**d**

CD31 NG2 PDGFRα DAPI

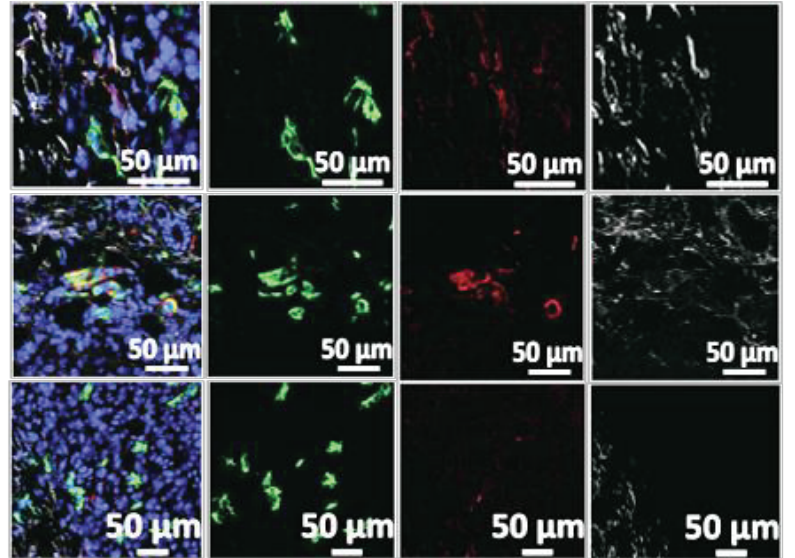

**a**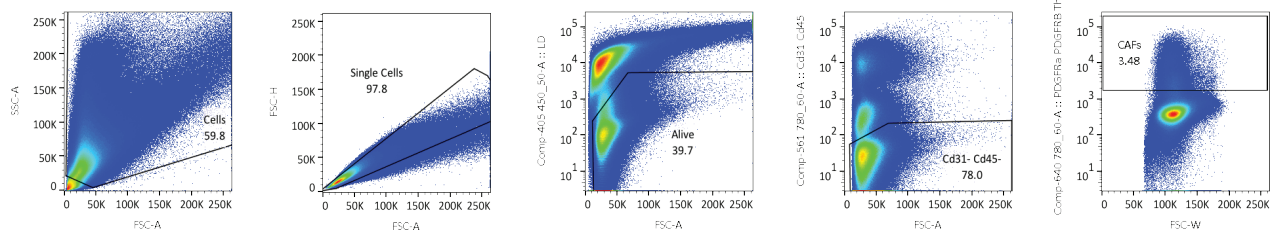**b**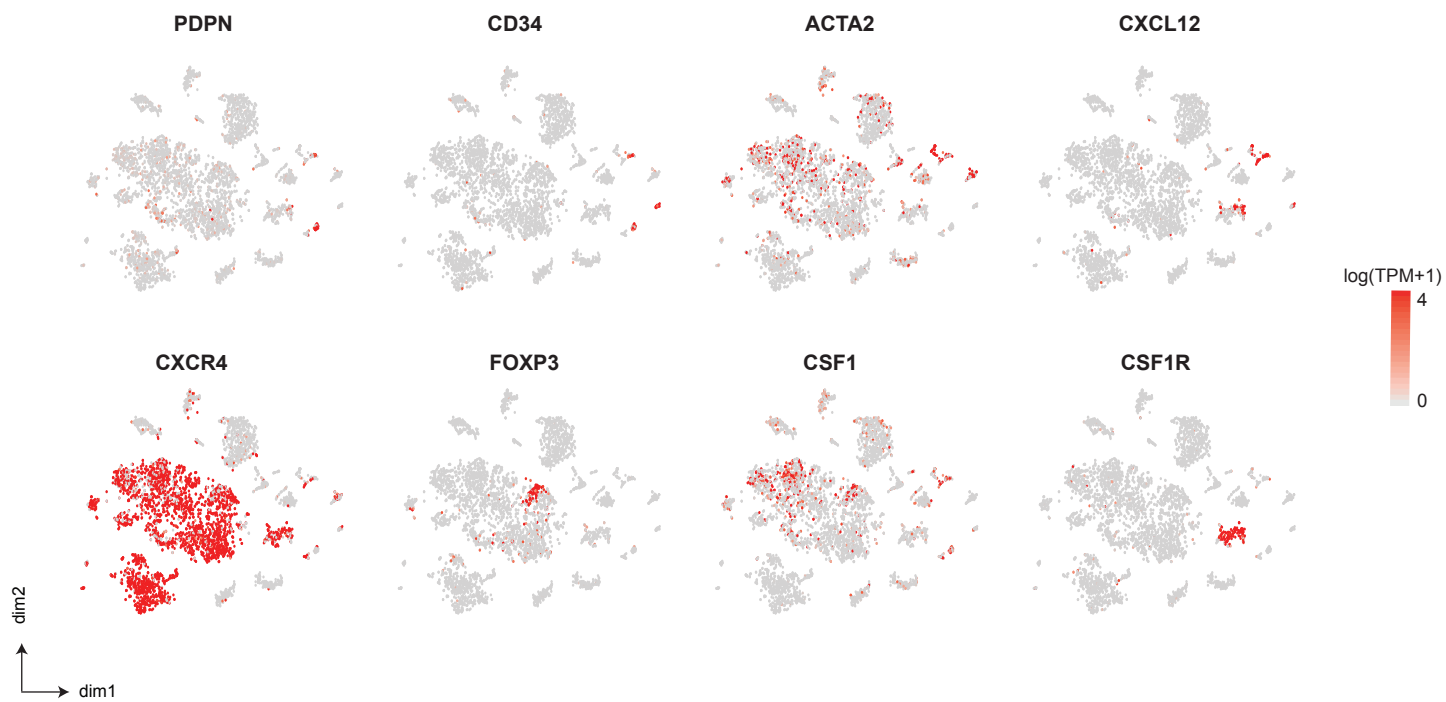

Supplement: Supplementary file [file 467225-1.pdf]
